# Supplementary material for: College roommates have a modest but significant influence on each other’s political ideology
Source: PubMed Central journal article supplement — Proc Natl Acad Sci U S A. 2020 Dec 21;118(2):e2015514117. doi: 10.1073/pnas.2015514117 (PMC7812804; doi:10.1073/pnas.2015514117), 2020-12-21
Supplement: pnas.2015514117.sapp.pdf [file pnas.2015514117.sapp.pdf]

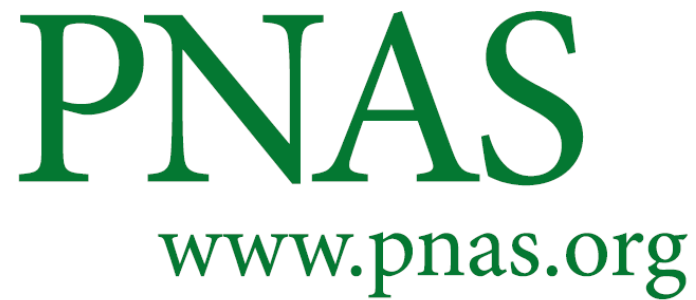

**Supplementary Information for**  
College Roommates Have a Modest but Significant Influence on  
Each Other's Political Ideology

Logan Strother, Spencer Piston, Ezra Golberstein, Sarah Gollust, and Daniel Eisenberg

Corresponding author: Logan Strother  
Email: [lstrothe@purdue.edu](mailto:lstrothe@purdue.edu)

**This PDF file includes:**

Supplementary Information Text  
Figures S1 to S2  
Tables S1 to S13

## Supplementary Information Text

### Subhead. Survey Questionnaire

{PRG: A1 SELECT ALL THAT APPLY}

A1. How do you usually describe your race and/or ethnicity? (*Select all that apply*)

- 1 White or Caucasian
- 2 African American/Black
- 3 Hispanic/Latino
- 4 American Indian/Alaskan Native
- 5 Arab/Middle Eastern or Arab American
- 6 Asian/Asian American
- 7 Pacific Islander
- 8 Other (specify) [TEXT RESPONSE]

A2. What is the highest level of education completed by either of your parents?

- 1 Eighth grade or lower
- 2 Between 9<sup>th</sup> and 12<sup>th</sup> grade (but no high school degree)
- 3 High school degree
- 4 Some college (but no college degree)
- 5 Associate's degree
- 6 Bachelor's degree
- 7 Graduate degree
- 8 Don't know

A3. What is your gender?

- 1 Male
- 2 Female
- 3 Other (specify) [TEXT RESPONSE]

A4. How religious would you say you are?

- 1 Very religious
- 2 Fairly religious
- 3 Not too religious
- 4 Not religious at all

A5. How would you characterize your political views?

- 1 Far left
- 2 Liberal
- 3 Middle-of-the-road
- 4 Conservative
- 5 Far right

A3. How would you describe your sexual orientation?

- 1 Heterosexual
- 2 Bisexual

- 3 Gay/Lesbian/Queer
- 4 Questioning
- 5 Other (specify) [TEXT RESPONSE]

{PRG: Section B “How You’ve Been Doing”}

{PRG: SHOW B1 IF PRE\_2=1, OTHERWISE SKIP TO FILTER BEFORE B2}

B1. **During the past year**, how often did you feel depressed?

- 1 Frequently
- 2 Occasionally
- 3 Not at all

(Source: CIRP survey)

{PRG: SHOW B2 IF PRE\_2=1, OTHERWISE SKIP TO FILTER BEFORE B3}

How would you rate your emotional health, as compared with the average person your age?

- 1 Highest 10%
- 2 Above Average
- 3 Average
- 4 Below Average
- 5 Lowest 10%

(Source: CIRP survey)

{PRG: GRID B3a-b}

B3. **Over the last 2 weeks**, how often have you been bothered by any of the following problems?

- 1 Not at all
- 2 Several days
- 3 More than half the days
- 4 Nearly every day

B3\_a Little interest or pleasure in doing things

B3\_b Feeling down, depressed or hopeless

(Source: PHQ-2; Kroenke et al, 2003 *Medical Care*)

{PRG: GRID B4a-B4f}

B4. **During the past 30 days**, about how often did you feel...

- 1 All of the time
- 2 Most of the time
- 3 Some of the time
- 4 A little of the time
- 5 None of the time

B4\_a ...nervous?

B4\_b .....hopeless?

B4\_c .....restless or fidgety?

B4\_d .....so depressed that nothing could cheer you up?

B4\_e .....that everything was an effort?

B4\_f .....worthless?

(Source: K6 index of psych. distress; Kessler et al, 2003 *Arch Gen Psych*; Whitlock et al, 2007 *Pediatrics*)

{PRG: GRID B5a-B5e}

1 Yes

2 No

B5\_a. Do you make yourself sick because you feel uncomfortably full?

B5\_b. Do you worry you have lost control over how much you eat?

B5\_c. Have you recently lost more than 14 pounds in a 3 month period?

B5\_d. Do you believe yourself to be fat when others say you are thin?

B5\_e. Would you say that food dominates your life?

(Source: SCOFF Eating Disorder screen: Cotton et al, 2003 *BMJ*; Eisenberg et al, 2009 *J Am Coll Health*)

{PRG: GRID B6a-B6c}

B6. How often have you felt this way **during the past week**:

1 Rarely or none of the time (less than 1 day)

2 Some or a little of the time (1-2 days)

3 Occasionally or a moderate amount of the time (3-4 days)

4 Most or all of the time (5-7 days)

B6\_a. I felt hopeful about the future

B6\_b. I was happy

B6\_c. I enjoyed life

(Source: NIMH Clinical Epidemiological Survey-Depression; Fowler and Christakis 2008 *BMJ*)

{PRG: B7 SELECT ALL THAT APPLY}

{PRG: MAKE 8 MUTUALLY EXCLUSIVE}

B7. Have you ever been diagnosed with any of the following conditions by a health professional (e.g., primary care doctor, psychiatrist, psychologist, etc.)? (*Select all that apply*)

1 Depression (e.g., major depressive disorder, bipolar/manic depression, dysthymia)

2 Anxiety (e.g., generalized anxiety disorder, phobias, obsessive-compulsive disorder, post-traumatic stress disorder)

3 Attention disorder or learning disability (e.g., attention deficit disorder, attention deficit hyperactivity disorder, learning disability)

4 Eating disorder (e.g., anorexia nervosa, bulimia nervosa)

5 Psychosis (e.g., schizophrenia, schizo-affective disorder)

6 Personality disorder (e.g., antisocial personality disorder, paranoid personality disorder, schizoid personality disorder)

- 7 Substance abuse disorder (e.g., alcohol abuse, abuse of other drugs)
- 8 No, none of these

B8. **In your lifetime**, did you ever seriously think about attempting suicide?

- 1 Yes
- 2 No

{PRG: IF B8=1, SHOW B9; OTHERWISE SKIP TO FILTER BEFORE C1}

B9. **In the past six months**, did you ever seriously think about attempting suicide?

- 1 Yes
- 2 No

{PRG: Section C “Behaviors and Lifestyle”}

{PRG: C1 SELECT ALL THAT APPLY}{PRG: MAKE 13 MUTUALLY EXCLUSIVE}

C1. This question asks about ways you may have hurt yourself on purpose, without intending to kill yourself. **In the past six months**, have you ever done any of the following intentionally? (Select all that apply)

- 1 Cut myself
- 2 Burned myself
- 3 Punched or banged myself
- 4 Scratched or pinched myself severely
- 5 Pulled my hair, eyelashes, or eyebrows with intent to hurt myself
- 6 Bit myself
- 7 Prevented wound from healing
- 8 Carved words or symbols into skin
- 9 Rubbed sharp objects into skin
- 10 Punched or banged an object to hurt myself
- 11 Ripped or tore my skin
- 12 Other (specify) [TEXT RESPONSE]
- 13 No, none of these

{PRG: IF C1 < or =12, SHOW C2, OTHERWISE SKIP TO FILTER BEFORE C3}

C2. On average, how often in the **past six months** did you hurt yourself on purpose, without intending to kill yourself?

- 1 Once or twice
- 2 Once a month or less
- 3 2 or 3 times a month
- 4 Once or twice a week
- 5 3 to 5 days a week
- 6 Nearly every day, or every day

{PRG: IF PRE\_2=2, SHOW C3a, OTHERWISE SKIP TO C3}

C3a. **In your lifetime before this academic year (before August 2009)**, did you ever have at least 5 drinks of alcohol in a row?

- 1 Yes
- 2 No

**C3. Over the past 30 days**, on how many occasions have you had {SHOW “5 or more” if A0=1 OR 3 OR NOT ANSWERED OTHERWISE SHOW “4 or more”} drinks in a row?

- 1 None
- 2 Once
- 3 Twice
- 4 3 to 5 times
- 5 6-9 times
- 6 10 or more times

{PRG: IF PRE\_2=2, SHOW C4a, OTHERWISE SKIP TO C4}

**C4a. In your lifetime before this academic year (before August 2009)**, did you smoke 100 or more cigarettes in total?

- 1 Yes
- 2 No

**C4. In the past 30 days**, how many cigarettes did you smoke on average?

- 1 None
- 2 Less than one cigarette per day
- 3 One to five cigarettes per day
- 4 About one-half pack per day
- 5 About one pack per day
- 6 More than one pack per day

{PRG: C8 SELECT ALL THAT APPLY}{PRG: MAKE 8 MUTUALLY EXCLUSIVE}

**C5. In the past six months**, have you used any of the following drugs? (Select all that apply)

- 1 Marijuana (also known as grass, weed, pot, hash, or hash oil)
- 2 Cocaine (any form, including crack, powder, or freebase)
- 3 Heroin (also known as smack, junk, or China White)
- 4 Methamphetamines (also known as speed, crystal, meth, or ice)
- 5 Other stimulants (e.g., Ritalin, Adderall, etc) without a prescription
- 6 Ecstasy (also known as MDMA)
- 7 Other drugs without a doctor's prescription (specify) [TEXT RESPONSE]
- 8 None of the above

**C6. In the past 30 days**, about how many hours per week on average did you spend exercising? (include any exercise of moderate or higher intensity, where “moderate intensity” would be roughly equivalent to brisk walking or bicycling)

- 1 Less than 1
- 2 1-2

- 3 3-4
- 4 5 or more

C7. **In the past month**, did you make any sort of bet? (By “bet” we mean betting on sports, playing cards for money, playing gambling games online, buying lottery tickets, playing pool for money, playing slot machines, betting on horse races, or any other kind of betting or gambling)

- 1 Yes
- 2 No

C8. About how much do you weigh?

C8a [NUMERIC RESPONSE 50-1000] pounds

{DESIGN: SAME LINE C9a-C9b}

C9. About how tall are you?

C9\_a [NUMERIC RESPONSE 3-7]feet

C9\_b [NUMERIC RESPONSE 0-11]inches

C10. **In the past six months**, with how many different people have you had sex (oral sex or sexual intercourse)?

- 1 None
- 2 1
- 3 2
- 4 3-5
- 5 6 or more

{IF PRE\_2=1, SHOW C11; OTHERWISE SKIP TO FILTER BEFORE C12}

C11. **During high school**, about how many hours per day, on average, did you spend doing schoolwork (not counting time in classes)?

- 1 Less than one hour
- 2 1-2 hours
- 3 2-3 hours
- 4 3-5 hours
- 5 5-7 hours
- 6 7 or more hours

{IF PRE\_2=2, SHOW C12; OTHERWISE SKIP TO FILTER BEFORE D1}

C12. **During this school year**, about how many hours per day, on average, have you spent doing schoolwork (not counting time in classes)?

- 1 Less than one hour
- 2 1-2 hours
- 3 2-3 hours
- 4 3-5 hours
- 5 5-7 hours
- 6 7 or more hours

{PRG: Section D “Support and/or Treatment”}

D1. How much do you agree with the following statement: “When I feel depressed or sad, I tend to keep those feelings to myself. “

- 1 Strongly agree
- 2 Agree
- 3 Neither agree nor disagree
- 4 Disagree
- 5 Strongly disagree

(Source: Distress Disclosure Index (Kahn & Hessling, 2001 *J Social and Clinical Psychology*)

D2. **In the past 6 months**, did you ever think you needed help for emotional or mental health problems such as feeling sad, blue, anxious or nervous?

- 1 Yes
- 2 No

D3a. {PRG: D3a SELECT ALL THAT APPLY}{PRG: MAKE 7 MUTUALLY EXCLUSIVE}

**In your lifetime before this academic year (before August 2009)**, did you ever take any of the following types of medications? (*Select all that apply*)

- 1 PSYCHOSTIMULANTS (e.g., methylphenidate (Ritalin or Concerta), amphetamine salts (Adderall), dextroamphetamine (Dexedrine), etc.)
- 2 ANTIDEPRESSANTS (e.g., fluoxetine (Prozac), sertraline (Zoloft), paroxetine (Paxil), escitalopram (Lexapro), venlafaxine (Effexor), bupropion (Wellbutrin), etc.)
- 3 ANTI-PSYCHOTICS (e.g., haloperidol (Haldol), clozapine (Clozaril), risperidone (Risperdal), olanzapine (Zyprexa), etc.)
- 4 ANTI-ANXIETY MEDICATIONS (e.g., lorazepam (Ativan), clonazepam (Klonopin), alprazolam (Xanax), buspirone (BuSpar), etc.)
- 5 MOOD STABILIZERS (e.g., lithium, valproate (Depakote), lamotrigine (Lamictal), carbamazepine (Tegretol), etc.)
- 6 SLEEP MEDICATIONS (e.g., zolpidem (Ambien), zaleplon (Sonata), etc.)
- 7 No, none of these

{PRG: D3 SELECT ALL THAT APPLY}{PRG: MAKE 7 MUTUALLY EXCLUSIVE}

D3. **In the past 6 months**, have you taken any of the following types of medications? (*Select all that apply*)

- 1 PSYCHOSTIMULANTS (e.g., methylphenidate (Ritalin or Concerta), amphetamine salts (Adderall), dextroamphetamine (Dexedrine), etc.)
- 2 ANTIDEPRESSANTS (e.g., fluoxetine (Prozac), sertraline (Zoloft), paroxetine (Paxil), escitalopram (Lexapro), venlafaxine (Effexor), bupropion (Wellbutrin), etc.)
- 3 ANTI-PSYCHOTICS (e.g., haloperidol (Haldol), clozapine (Clozaril), risperidone (Risperdal), olanzapine (Zyprexa), etc.)



- 4 ANTI-ANXIETY MEDICATIONS (e.g., lorazepam (Ativan), clonazepam (Klonopin), alprazolam (Xanax), buspirone (BuSpar), etc.)
- 5 MOOD STABILIZERS (e.g., lithium, valproate (Depakote), lamotrigine (Lamictal), carbamazepine (Tegretol), etc.)
- 6 SLEEP MEDICATIONS (e.g., zolpidem (Ambien), zaleplon (Sonata), etc.)
- 7 No, none of these

{PRG: Select ALL THAT APPLY }

{PRG: IF D3<7, SHOW D4; OTHERWISE SKIP TO FILTER BEFORE D5 }

D4.How did you get the medication(s) you just indicated? (*Select all that apply*)

- 1 Medical prescription
- 2 From someone I know (without a prescription)
- 3 Other source (specify) [TEXT RESPONSE]

{PRG: Select ALL THAT APPLY }

{PRG: IF D3<7, SHOW D5; OTHERWISE SKIP TO FILTER BEFORE D6 }

D5.For what purpose(s) have you taken the medication(s) you just indicated? (*Select all that apply*)

- 1 Mental or emotional health
- 2 Other health reasons
- 3 Academic performance
- 4 Recreation/fun
- 5 Other (specify) [TEXT RESPONSE]

D6a. **In your lifetime before this academic year (before August 2009)**, did you ever receive counseling or therapy for your mental or emotional health from a health professional (such as a psychiatrist, psychologist, social worker, or primary care doctor)?

- 1 No
- 2 Yes, 1-2 visits
- 3 Yes, 3-4 visits
- 4 Yes, 5 or more visits

D6.**In the past 6 months**, have you received counseling or therapy for your mental or emotional health from a health professional (such as a psychiatrist, psychologist, social worker, or primary care doctor)?

- 1 No
- 2 Yes, 1-2 visits
- 3 Yes, 3-4 visits
- 4 Yes, 5 or more visits

{PRG: D7 SELECT ALL THAT APPLY }

{PRG: D7.7 MUTUALLY EXCLUSIVE }

D7. **In the past 6 months**, have you received counseling or support for your mental or emotional health from any of the following other sources? (*Select all that apply*)

- 1 {PRG: SHOW IF PRE\_2=2}Roommate
- 2 Friend
- 3 Family member
- 4 Religious counselor or other religious contact
- 5 Support group
- 6 Other non-clinical source (specify) [TEXT RESPONSE]
- 7 None of the above

{PRG: IF PRE\_1=1 AND PRE\_2=2, SHOW D8; OTHERWISE SKIP TO FILTER BEFORE D9}

D8. **During this school year**, how many times have you discussed your mental or emotional health with your resident advisor (RA)?

- 1 None
- 2 1-2 times
- 3 3-4 times
- 4 5 or more times

{PRG: IF D8>1, SHOW D9; OTHERWISE SKIP TO FILTER BEFORE E1}

D9. How helpful, overall, were these discussions with your RA?

- 1 Very helpful
- 2 Somewhat helpful
- 3 Not very helpful
- 4 Not helpful at all

{PRG: Section E “Knowledge and Beliefs”}

E1. Please indicate how strongly you agree or disagree with the following statement:” If I needed to seek professional help for my mental or emotional health, I would know where to go.”

- 1 Strongly disagree
- 2 Disagree
- 3 Neither agree nor disagree
- 4 Agree
- 5 Strongly agree

E2. Relative to the average person, how knowledgeable are you about mental illnesses (such as depression and anxiety disorders) and their treatments? (*Please just give your best guess*)

- 1 Well above average
- 2 Above average
- 3 Average
- 4 Below average
- 5 Well below average

E3. How helpful on average do you believe therapy or counseling is, when provided competently, for people your age who are clinically depressed?

- 1 Very helpful
- 2 Quite helpful
- 3 A little helpful
- 4 Not at all helpful

E4. How helpful on average do you believe medication is, when provided competently, for people your age who are clinically depressed?

- 1 Very helpful
- 2 Quite helpful
- 3 A little helpful
- 4 Not at all helpful

{PRG: GRID A5a-A5b}

E5. Please indicate whether you agree or disagree with the following statements.

- 1 Strongly agree
- 2 Agree
- 3 Somewhat agree
- 4 Somewhat disagree
- 5 Disagree
- 6 Strongly disagree

E5\_a. Most people think less of someone who has received mental health treatment.

E5\_b. I think less of someone who has received mental health treatment.

{PRG: Section F "Social Interactions"}

{PRG: IF PRE\_1=1 AND PRE\_2=2, SHOW F1-F5; OTHERWISE SKIP TO FILTER BEFORE G1}

{PRG: GRID F1a-F1b}

F1. The last few questions of this survey will ask you about your roommate(s). If you have more than one roommate, please think about your roommates collectively when answering the questions.

How much do you agree with the following statements:

- 1 Strongly agree
- 2 Agree
- 3 Neither agree nor disagree
- 4 Disagree
- 5 Strongly disagree

F1\_a. I am a close friend with my roommate(s).

F1\_b. I enjoy being in the room at the same time as my roommate(s).

(Source: Winston, R. B. & Yaranovich, M.F. (1994). Quality of roommate relationships: Development of the Roommate Relationship Inventory. Journal of College and University Student Housing, 24, 6-11.)

F2. **During this school year**, about how much time per day on average have you spent doing things or hanging out with your roommate(s)?

- 1 Less than 15 minutes
- 2 15-30 minutes
- 3 30 minutes-1 hour
- 4 1-2 hours
- 5 2-4 hours
- 6 4 or more hours

F3. **During this school year**, about how often have you discussed any of **your** personal or emotional problems with your roommate(s)?

- 1 Never
- 2 Once or twice total
- 3 Once every month or two
- 4 Once every week or two
- 5 A couple times per week
- 6 Almost every day

F4. **During this school year**, about how often have you discussed any of **your roommate(s)**'s personal or emotional problems with him/her?

- 1 Never
- 2 Once or twice total
- 3 Once every month or two
- 4 Once every week or two
- 5 A couple times per week
- 6 Almost every day

F5. **Before you moved into your campus residence last fall**, about how much time in total had you spent corresponding with and/or hanging out with your roommate(s)?

- 1 None
- 2 Less than 2 hours
- 3 2-5 hours
- 4 6-10 hours
- 5 11-20 hours
- 6 More than 20 hours

{PRG: Section G "Being an RA"}

{PRG: IF PRE\_1=2 AND SHOW G1-G8; OTHERWISE SKIP TO QCOMMENT}

Now we would like to ask a few questions related to your role as an RA. Please remember that this survey is confidential-- your name will never be linked to any of your answers.

{PRG: If PRE\_2=1 SHOW G1; OTHERWISE SKIP TO FILTER BEFORE G2}

G1. Prior to your current position, how many times had you already been an RA?

- 1 0 (this is my first time)
- 2 1
- 3 2 or more

{PRG: If PRE\_2=1 SHOW G2; OTHERWISE SKIP TO FILTER BEFORE G3}

G2. Please indicate how much you agree with the following statements:

- 1 Strongly agree
- 2 Agree
- 3 Neutral
- 4 Disagree
- 5 Strongly Disagree

G2\_a. I know what mental health and counseling resources are available for students.

G2\_b. I have a good idea of how to recognize that a student is in emotional or mental distress.

{PRG: If PRE\_2=1 SHOW G3; OTHERWISE SKIP TO FILTER BEFORE G4}

G3. Relative to other resident advisors (RAs), how competent would you say you are at identifying students with significant emotional or mental distress?

- 1 Well above average
- 2 Above average
- 3 Average
- 4 Below average
- 5 Well below average

{PRG: If PRE\_2=1 SHOW G4; OTHERWISE SKIP TO FILTER BEFORE G5}

G4. Relative to other resident advisors (RAs), how competent would you say you are at helping students receive the appropriate services for significant emotional or mental distress?

- 1 Well above average
- 2 Above average
- 3 Average
- 4 Below average
- 5 Well below average

{PRG: If PRE\_2=2 SHOW G5; OTHERWISE SKIP TO FILTER BEFORE G6}

G5. **During this academic year**, how often have you referred students to professional services (such as the counseling center) for issues related to their mental or emotional health?

- 1 Several times per week

- 2 Once or twice per week
- 3 Once or twice per month
- 4 A couple times total
- 5 None

{PRG: If PRE\_2=2 SHOW G6; OTHERWISE SKIP TO FILTER BEFORE G7}

G6. **During this academic year**, how often have you provided advice or support to students for issues related to their mental or emotional health?

- 1 Several times per week
- 2 Once or twice per week
- 3 Once or twice per month
- 4 A couple times total
- 5 None

{PRG: If PRE\_2=2 SHOW G7; OTHERWISE SKIP TO FILTER BEFORE G8}

G7. **During this academic year**, how successful overall have you been with providing support for students ~~in your hall~~ with issues related to their mental or emotional health?

- 1 Very successful
- 2 Somewhat successful
- 3 Not very successful
- 4 Not at all successful
- 5 Not applicable (have not had the occasion to try this)

{PRG: If PRE\_2=2 SHOW G8; OTHERWISE SKIP TO QCOMMENT}

G8. **During this academic year**, how successful have you been with referring students ~~in your hall~~ to treatment or other resources, when needed, for issues related to their mental or emotional health?

- 1 Very successful
- 2 Somewhat successful
- 3 Not very successful
- 4 Not at all successful
- 5 Not applicable (have not had the occasion to try this)

QCOMMENT. Please enter any additional comments you would like to share regarding this survey.

[INSERT COMMENTARY]

## I. **Institution A Housing Preference Survey**

{Accommodation Needs }

1. Do you have an accommodation or assignment need, such as those listed below, based on a disability, food allergy or chronic health condition?  
{list}

1. Yes, I do have a such an accommodation or assignment need
2. No, I do not have such an accommodation or assignment need

2. If you require housing for Spring Half-Term, Summer Half-Term or the entire Spring/Summer

Term, please select the appropriate choice below.

1. Spring Half-Term only
2. Summer Half-Term only
3. Spring/Summer Term
4. None of the above

{Spring/Summer Housing - Room Type Preference}

3. You must indicate at least one preference, or you may rank both, with number one being your

first preference.

( 1 2 ) Single

( 1 2 ) Double

4. {piped if chosen 'Double'}

You have chose a preference for a double room. Do you have a roommate request?

If yes, enter your requested roommate's 8-digit ID number (required).

1. Yes, my requested roommate's 8-digit ID number is [text box]
2. No, I have no roommate request

{Fall Term Housing}

5. Are you a {university redacted} scholarship athlete?

1. Yes
2. No

6. {piped if 'Yes'}

Indicate your scholarship sport.

{list}

7. Indicate your room environment preference:

1. I do not smoke and request substance-free housing
2. I do not smoke and request a non-smoking roommate
3. I am allergic to smoke and request a non-smoking roommate
4. I am a smoker and I understand that all residence halls are non-smoking

8. You must indicate at least two preferences, or you may rank up to three, with number one being

your first preference.

( 1 2 3 ) Rate A

( 1 2 3 ) Rate B

( 1 2 3 ) Rate C

( 1 2 3 ) Rade D

{rate chart}

9. Rank the neighborhood selections, with number one being your first preference.

( 1 2 3 ) {neighborhood name redacted}

( 1 2 3 ) {neighborhood name redacted}

( 1 2 3 ) {neighborhood name redacted}

10. You must indicate at least one preference, or you may rank up to three, with number one being your first preference.

( 1 2 3 ) All-female residence hall

( 1 2 3 ) Coed residence hall, single-gender corridor

( 1 2 3 ) Coed residence hall, coed corridor

11. Have you been admitted to the Residential College?

1. Yes

2. No

12. Have you been invited to join and do you plan to participate in the Honors Program?

1. Yes

2. No

13. {piped if 'Yes' to 12}

You have indicated that you have been invited to join and do you plan to participate in the Honors Program. Indicate which one of the following applies.

1. I would like to live in Honors Housing. I do not wish to apply to an additional {redacted} program.

2. I do not want to live in Honors Housing. I do not wish to apply to an additional {redacted} program.

3. I wish to apply to an additional {redacted} program.

14. Do you have a roommate request?

1. No, I have no roommate request.

2. Yes, I have a roommate request.

ID number [text box 1]

ID number [text box 2]

ID number [text box 3]

## II. **Institution B Housing Preference Survey**

1. What is your gender?

1. Male

2. Female

2. College:

{list}

3. Major:

{list}



4. Ethnicity {all that apply}
  - White
  - Hispanic
  - Black
  - Asian
  - American Indian
  - Hawaiian/Pacific Islander
  - Other
  - N/A
  
5. Citizenship
  - {list, global}
  
6. Room Preference
  1. ( 1 2 3 4 ) Single
  2. ( 1 2 3 4 ) Double
  3. ( 1 2 3 4 ) Triple
  4. ( 1 2 3 4 ) Quad
  5. ( 1 2 3 4 ) Townhouse Apt. Double

{Lifestyle questionnaire for matching roommates }

1. I tend to get to bed at:  
10 p.m. \_\_\_\_\_ 2 a.m.
  
2. I play a musical instrument.
  1. Yes
  2. No
  
3. {Musical interests}
 

|                       |              |       |
|-----------------------|--------------|-------|
| I listen to Classical | Always _____ | Never |
| I listen to County    | Always _____ | Never |
| I listen to Hip-Hop   | Always _____ | Never |
| I listen to Latin     | Always _____ | Never |
| I listen to Pop       | Always _____ | Never |
| I listen to Rock      | Always _____ | Never |
  
4. My room condition is generally  
Neat \_\_\_\_\_ Messy
  
5. The social condition of my room will most likely be  
Lively \_\_\_\_\_ Reserved
  
6. I sleep with background noise (radio, TV, fan, etc.).  
Always \_\_\_\_\_ Never
  
7. Do you smoke?
  1. Yes
  2. No

8. I study with background noise (radio, TV, fan, etc.).  
Always \_ \_ \_ \_ \_ Never

9. I tend to wake up at: 6 a.m. \_ \_ \_ \_ \_ 11 a.m.

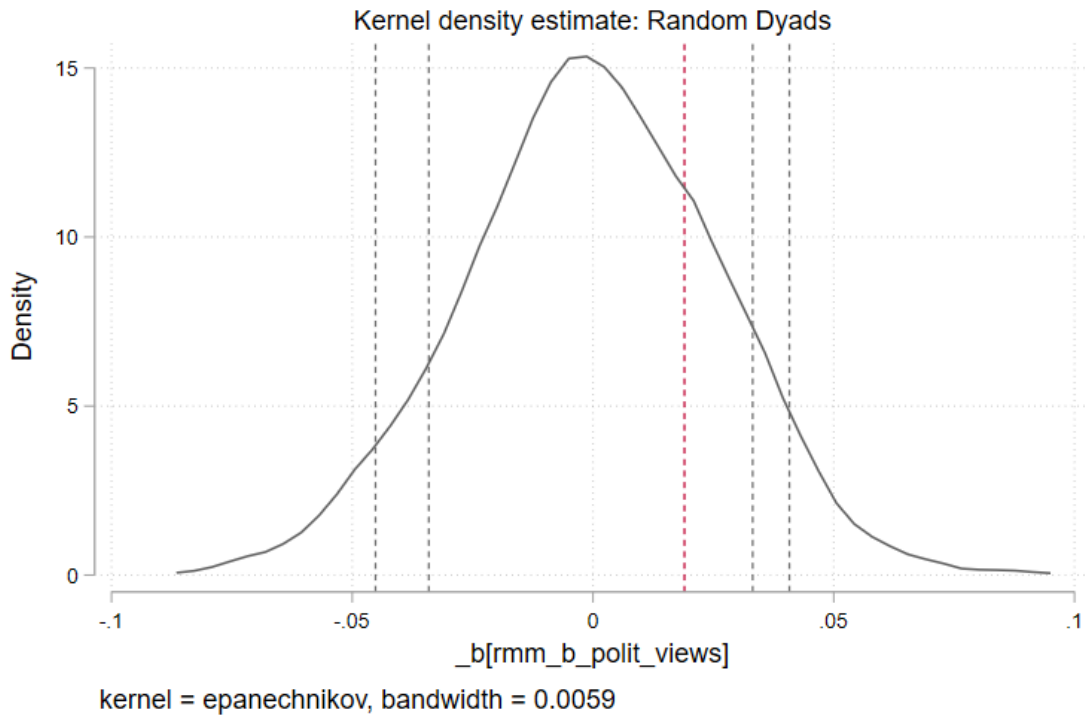

**Fig. S1.** Randomization Check via Simulated Roommate Pairings

Note: We simulated 1,000 random pairings of roommates and estimate the randomization check regression (as in Table A11) each time. The figure presents the distribution of coefficients from the random pairings. The gray vertical lines indicate the 5th, 10th, 90th, and 95th percentiles of the distribution, respectively. The red vertical line indicates our actual estimated coefficient (reported in Table A11). In showing that our actual estimate is not an extreme value among the simulated pairings, this analysis further increases confidence in the random assignment of roommate pairings net of the measured roommate preferences.

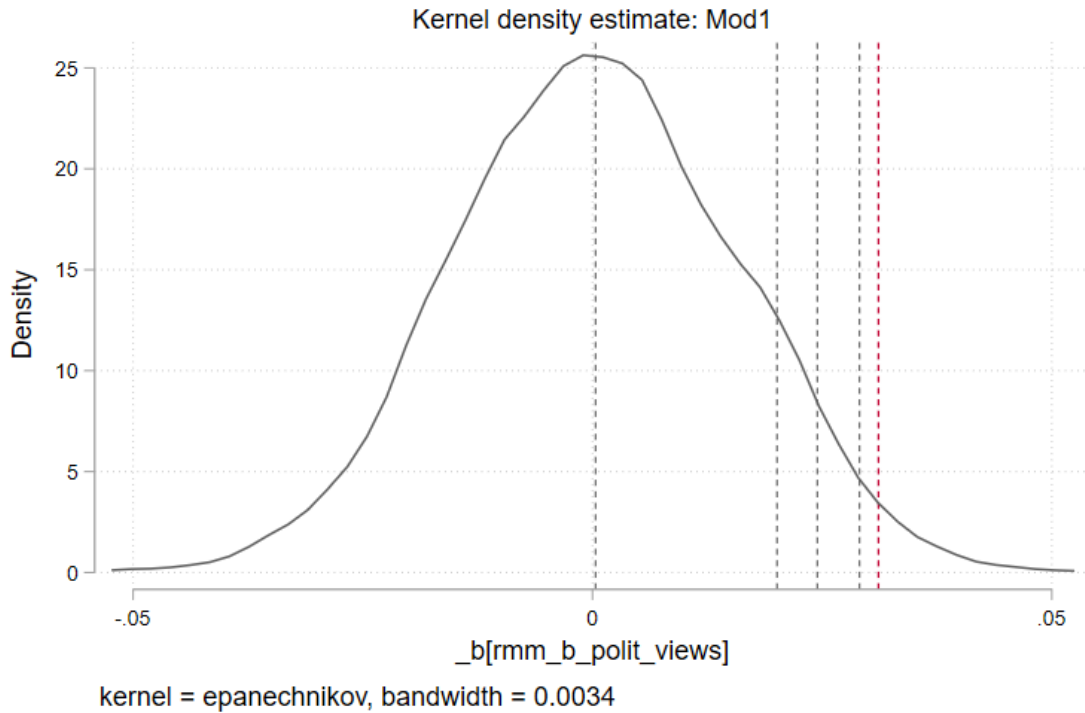

**Fig. S2. Robustness Check: Randomization Inference**

Note: We simulated 1,000 random pairings of roommates and estimate Model 1 (from Table 4/A4) each time. The figure presents the distribution of coefficients from the random pairings. The gray vertical lines indicate the 50<sup>th</sup>, 90<sup>th</sup>, 95<sup>th</sup>, and 97.5<sup>th</sup> percentiles of the distribution, respectively. The red vertical line indicates our actual estimated coefficient (from Model 1 in Table 4/A4). In showing that our true estimate is an outlier among the estimates from the randomized dyads, this figure increases confidence in the main finding reported here. That is, the figure shows that our core finding is robust to an alternative set of identifying assumptions.

**Table S1.** Characteristics of primary analytic sample (August 2009)

|                              | N    | % or mean   |
|------------------------------|------|-------------|
| University A (large public)  | 1120 | 0.69        |
| University B (large private) | 512  | 0.31        |
| Double room                  | 1299 | 0.79        |
| Triple room                  | 272  | 0.17        |
| Quad room                    | 61   | 0.04        |
| Age (in years), mean         |      | 18.4 (0.40) |
| Female                       | 860  | 0.53        |
| Male                         | 772  | 0.47        |
| White                        | 1149 | 0.70        |
| Asian                        | 268  | 0.16        |
| Black                        | 48   | 0.03        |
| Hispanic                     | 74   | 0.05        |
| Other                        | 31   | 0.02        |
| Multi                        | 61   | 0.04        |
| Parents' education           |      |             |
| Less than college degree     | 263  | 0.16        |
| College degree               | 445  | 0.27        |
| Graduate degree              | 913  | 0.56        |

**Table S2.** Associations between Variables and Assignment to Treatment (i.e. Roommate of Different Ideology at Wave 1)

|                             | TME1(1)        | TME1(2)        | TME1(3)          |
|-----------------------------|----------------|----------------|------------------|
| Roommate Ideology W1        | 0.09<br>(0.08) | 0.10<br>(0.08) | 0.11<br>(0.08)   |
| Univ. Dummy (Private=1)     | --             | 0.22<br>(0.16) | 0.26<br>(0.16)   |
| Roommate Binge              | --             | --             | 0.02<br>(0.15)   |
| Roommate Smoke              | --             | --             | -0.25<br>(0.26)  |
| Roommate Drugs              | --             | --             | 0.10<br>(0.18)   |
| Roommate Gambled            | --             | --             | -0.05<br>(0.15)  |
| Roommate Sex Mult. Partners | --             | --             | -0.15<br>(0.23)  |
| Roommate K6 Score           | --             | --             | -0.01<br>(0.02)  |
| Roommate Parents Educ.      | --             | --             | -0.04<br>(0.06)  |
| Roommate Religiosity        | --             | --             | 0.00<br>(0.07)   |
| Roommate Exercise Freq.     | --             | --             | -0.05<br>(0.06)  |
| Roommate Study Hours        | --             | --             | -0.12*<br>(0.05) |
| Roommate Pretest (zscore)   | --             | --             | 0.00<br>(0.08)   |
| Roommate HSGPA (zscore)     | --             | --             | 0.02<br>(0.07)   |
| Constant                    | 0.20<br>(0.22) | 0.11<br>(0.22) | 0.88<br>(0.53)   |
| Observations                | 1,632          | 1,632          | 1,593            |

**Table S3.** Baseline Characteristics by Sample Attrition

|                                      | Initial sample | Baseline respondents (BRs) | BRs w/ Roommate (RM) BRs | <i>Final analytic sample</i> (BRs who responded at follow-up, w/ RM BRs) |
|--------------------------------------|----------------|----------------------------|--------------------------|--------------------------------------------------------------------------|
| N                                    | 4971           | 3501                       | 2589                     | 1632                                                                     |
| Age                                  | 18.4           | 18.4                       | 18.4                     | 18.4                                                                     |
| Female                               | 0.50           | 0.50                       | 0.51                     | 0.53                                                                     |
| Asian or Pacific Islander            | 0.15           | 0.16                       | 0.16                     | 0.16                                                                     |
| Black                                | 0.04           | 0.04                       | 0.04                     | 0.04                                                                     |
| Hispanic or Latino                   | 0.04           | 0.04                       | 0.04                     | 0.04                                                                     |
| Other or multiple categories         | 0.07           | 0.06                       | 0.07                     | 0.06                                                                     |
| White                                | 0.70           | 0.70                       | 0.69                     | 0.70                                                                     |
| U.S. citizen                         | 0.91           | 0.92                       | 0.91                     | 0.92                                                                     |
| Parents' education: < college degree |                | 0.16                       | 0.16                     | 0.16                                                                     |
| Parents' education: college degree   |                | 0.28                       | 0.28                     | 0.27                                                                     |
| Parents' education: graduate degree  |                | 0.56                       | 0.56                     | 0.56                                                                     |
| Ideology = Liberal                   |                | 44.83                      | 44.90                    | 44.49                                                                    |
| Ideology = Middle of the road        |                | 34.76                      | 34.79                    | 36.51                                                                    |
| Ideology = Conservative              |                | 20.51                      | 20.31                    | 19.00                                                                    |

Note: none of the differences are significant across a single layer of attrition (from one column to the next one on the right); the difference in the proportion of females in the initial sample versus the final sample is significant, however ( $Z=2.1$ ,  $p=0.04$ ).

**Table S4.** Full list of coefficient estimates for models presented in Table 4

|                                    | (1)                           | (2)                           | (3)                           | (4)               | (5)                          | (6)                |
|------------------------------------|-------------------------------|-------------------------------|-------------------------------|-------------------|------------------------------|--------------------|
| Roommate ideology                  | 0.031 <sup>†</sup><br>(0.016) | 0.031 <sup>†</sup><br>(0.016) | 0.031 <sup>†</sup><br>(0.017) | 0.039*<br>(0.017) | 0.032*<br>(0.015)            | 0.046*<br>(0.018)  |
| Respondent ideology (wave 1)       | 0.81***<br>(0.01)             | 0.81***<br>(0.01)             | 0.80***<br>(0.01)             | 0.81***<br>(0.02) | 0.77***<br>(0.018)           | 0.76***<br>(0.02)  |
| Institution                        | --                            | -0.01<br>(0.03)               | --                            | --                | --                           | --                 |
| Roommate binge drinking            | --                            | --                            | --                            | -0.00<br>(0.03)   | --                           | -0.00<br>(0.03)    |
| Roommate smoking                   | --                            | --                            | --                            | 0.03<br>(0.05)    | --                           | 0.04<br>(0.06)     |
| Roommate drugs                     | --                            | --                            | --                            | -0.01<br>(0.04)   | --                           | 0.02<br>(0.04)     |
| Roommate gambling                  | --                            | --                            | --                            | 0.05<br>(0.03)    | --                           | 0.04<br>(0.04)     |
| Roommate sex multiple partners     | --                            | --                            | --                            | 0.01<br>(0.05)    | --                           | -0.01<br>(0.05)    |
| Roommate psychological distress    | --                            | --                            | --                            | 0.00<br>(0.00)    | --                           | 0.00<br>(0.00)     |
| Roommate parents' education        | --                            | --                            | --                            | 0.02*<br>(0.01)   | --                           | 0.02<br>(0.01)     |
| Roommate religiosity               | --                            | --                            | --                            | 0.02<br>(0.01)    | --                           | 0.02<br>(0.02)     |
| Roommate exercise                  | --                            | --                            | --                            | -0.00<br>(0.01)   | --                           | -0.01<br>(0.01)    |
| Roommate hours spent studying      | --                            | --                            | --                            | -0.00<br>(0.01)   | --                           | -0.00<br>(0.01)    |
| Roommate admissions test score     | --                            | --                            | --                            | -0.01<br>(0.02)   | --                           | -0.01<br>(0.02)    |
| Roommate high school GPA (z-score) | --                            | --                            | --                            | 0.00<br>(0.01)    | --                           | 0.01<br>(0.02)     |
| Roommate Preferences               | --                            | --                            | ✓                             | --                | --                           | ✓                  |
| Respondent female                  | --                            | --                            | --                            | --                | -0.05 <sup>†</sup><br>(0.02) | -0.94***<br>(0.08) |
| Respondent race (White)            | --                            | --                            | --                            | --                | -0.03<br>(0.05)              | -0.01<br>(0.06)    |
| Respondent race (Black)            | --                            | --                            | --                            | --                | -0.14 <sup>†</sup><br>(0.08) | -0.12<br>(0.08)    |
| Respondent race (Hispanic)         | --                            | --                            | --                            | --                | -0.09<br>(0.06)              | -0.06<br>(0.07)    |
| Respondent race (Asian)            | --                            | --                            | --                            | --                | 0.0003                       | 0.02               |



|                               |         |         |        |        |          |          |
|-------------------------------|---------|---------|--------|--------|----------|----------|
|                               | --      | --      | --     | --     | (0.05)   | (0.06)   |
| Respondent sexual orientation | --      | --      | --     | --     | -0.10*** | -0.10*** |
|                               | --      | --      | --     | --     | (0.03)   | (0.03)   |
| Respondent religiosity        | --      | --      | --     | --     | -0.08*** | -0.08*** |
|                               | --      | --      | --     | --     | (0.01)   | (0.02)   |
| Constant                      | 0.46*** | 0.47*** | -0.24  | 0.23   | 0.96***  | 0.90*    |
|                               | (0.06)  | (0.06)  | (0.41) | (0.12) | (0.10)   | (0.42)   |
| Observations                  | 1,632   | 1,632   | 1,632  | 1,593  | 1,624    | 1,585    |
| Clusters                      | 1,052   | 1,052   | 1,052  | 1,038  | 1,047    | 1,033    |
| R-squared                     | 0.65    | 0.65    | 0.67   | 0.65   | 0.65     | 0.69     |

**Table S5.** Full Models for Figure 1

| VARIABLES                   | Change in<br>Ideology |
|-----------------------------|-----------------------|-----------------------|-----------------------|-----------------------|-----------------------|-----------------------|
| 3 Pts More Lib              | 0.12<br>(0.12)        | 0.12<br>(0.12)        | 0.12<br>(0.12)        | 0.13<br>(0.13)        | 0.14<br>(0.12)        | 0.15<br>(0.13)        |
| 2 Pts More Lib              | 0.19***<br>(0.06)     | 0.19***<br>(0.06)     | 0.19***<br>(0.06)     | 0.19***<br>(0.06)     | 0.20***<br>(0.06)     | 0.21***<br>(0.06)     |
| 1 Pt More Lib               | 0.09**<br>(0.03)      | 0.09**<br>(0.03)      | 0.09**<br>(0.03)      | 0.10**<br>(0.03)      | 0.11***<br>(0.03)     | 0.12***<br>(0.04)     |
| 1 Pt More Cons              | -0.11***<br>(0.03)    | -0.11***<br>(0.03)    | -0.11***<br>(0.03)    | -0.12***<br>(0.03)    | -0.13***<br>(0.03)    | -0.13***<br>(0.03)    |
| 2 Pts More Cons             | -0.28***<br>(0.06)    | -0.28***<br>(0.06)    | -0.28***<br>(0.06)    | -0.31***<br>(0.06)    | -0.31***<br>(0.06)    | -0.38***<br>(0.06)    |
| 3 Pts More Cons             | -0.68***<br>(0.19)    | -0.68***<br>(0.19)    | -0.68***<br>(0.19)    | -0.72***<br>(0.19)    | -0.75***<br>(0.19)    | -0.80***<br>(0.18)    |
| Univ. Dummy (Private=1)     | --                    | 0.01<br>(0.03)        | --                    | --                    | --                    | -0.72<br>(0.56)       |
| Roommate Binge              | --                    | --                    | --                    | 0.00<br>(0.03)        | --                    | 0.00<br>(0.03)        |
| Roommate Smoke              | --                    | --                    | --                    | 0.05<br>(0.06)        | --                    | 0.05<br>(0.06)        |
| Roommate Drugs              | --                    | --                    | --                    | 0.01<br>(0.04)        | --                    | 0.04<br>(0.04)        |
| Roommate Gambled            | --                    | --                    | --                    | 0.04<br>(0.03)        | --                    | 0.04<br>(0.04)        |
| Roommate Sex Mult. Partners | --                    | --                    | --                    | 0.01<br>(0.05)        | --                    | 0.00<br>(0.06)        |
| Roommate K6 Score           | --                    | --                    | --                    | 0.00<br>(0.00)        | --                    | 0.00<br>(0.00)        |
| Roommate Parents Educ.      | --                    | --                    | --                    | 0.03*<br>(0.01)       | --                    | 0.03*<br>(0.01)       |
| Roommate Religiosity        | --                    | --                    | --                    | 0.04**<br>(0.01)      | --                    | 0.04*<br>(0.02)       |
| Roommate Exercise Freq.     | --                    | --                    | --                    | -0.00<br>(0.01)       | --                    | -0.00<br>(0.01)       |
| Roommate Study Hours        | --                    | --                    | --                    | -0.00<br>(0.01)       | --                    | -0.00<br>(0.01)       |
| Roommate Pretest (zscore)   | --                    | --                    | --                    | -0.01<br>(0.02)       | --                    | -0.01<br>(0.02)       |
| Roommate HSGPA (zscore)     | --                    | --                    | --                    | 0.00<br>(0.01)        | --                    | 0.01<br>(0.02)        |
| Roommate Preferences        | --                    | --                    | ✓                     | --                    | --                    | ✓                     |
| Respondent female           | --                    | --                    | --                    | --                    | -0.04<br>(0.03)       | -0.96***<br>(0.08)    |
| Respondent race (White)     | --                    | --                    | --                    | --                    | -0.04<br>(0.06)       | -0.02<br>(0.06)       |
| Respondent race (Black)     | --                    | --                    | --                    | --                    | -0.13<br>(0.08)       | -0.14<br>(0.08)       |
| Respondent race (Hispanic)  | --                    | --                    | --                    | --                    | -0.07<br>(0.06)       | -0.05<br>(0.07)       |

|                               |        |        |        |        |          |          |
|-------------------------------|--------|--------|--------|--------|----------|----------|
| Respondent race (Asian)       | --     | --     | --     | --     | -0.02    | 0.00     |
|                               |        |        |        |        | (0.06)   | (0.06)   |
| Respondent sexual orientation | --     | --     | --     | --     | -0.09**  | -0.09**  |
|                               |        |        |        |        | (0.03)   | (0.03)   |
| Respondent religiosity        | --     | --     | --     | --     | -0.05*** | -0.05*** |
|                               |        |        |        |        | (0.01)   | (0.02)   |
| Constant                      | 0.05*  | 0.05*  | 0.05*  | -0.27* | 0.35***  | 0.71     |
|                               | (0.02) | (0.02) | (0.02) | (0.11) | (0.08)   | (0.38)   |
| Observations                  | 1,632  | 1,632  | 1,632  | 1,593  | 1,624    | 1,585    |
| Clusters                      | 1,052  | 1,052  | 1,052  | 1,038  | 1,047    | 1,033    |
| R-squared                     | 0.07   | 0.07   | 0.07   | 0.08   | 0.09     | 0.19     |

**Table S6.** Changes in student ideology relative to their roommate, among respondents who were assigned to roommate of a different political ideology  
Robustness Check for Table 3 from main text

| <i>Movement</i>    | <i>Respondent Ideology Wave 1</i> |         |        |              |           | Total |
|--------------------|-----------------------------------|---------|--------|--------------|-----------|-------|
|                    | far left                          | liberal | middle | conservative | far right |       |
| Away from Roommate | 0                                 | 16      | 43     | 1            | 0         | 60    |
| No Change          | 41                                | 341     | 277    | 167          | 2         | 828   |
| Toward Roommate    | 18                                | 70      | 46     | 42           | 4         | 178   |

Table A6 shows that of the students who changed ideology (but excluding those students at the extremes of the distribution), 238 had a roommate of a different ideology at wave 1; and of these, 178 (74.8%) moved toward their roommates. Furthermore, conservatives were somewhat more likely to move towards their roommates than were liberals; 81.4% of wave 1 liberals who moved, moved toward their roommate, while 97.7% of wave 1 conservatives who moved drifted toward their roommate.

**Table S7.** Associations between roommate ideology (wave 1) and student ideology (wave 2), analysis constrained to institution 1

|                                    | (1)               | (2)               | (3)               | (4)               | (5)               |
|------------------------------------|-------------------|-------------------|-------------------|-------------------|-------------------|
| Roommate ideology                  | 0.021<br>(0.032)  | 0.036<br>(0.035)  | 0.013<br>(0.034)  | 0.021<br>(0.031)  | 0.031<br>(0.034)  |
| Respondent ideology (wave 1)       | 0.79***<br>(0.03) | 0.78***<br>(0.03) | 0.77***<br>(0.03) | 0.74***<br>(0.03) | 0.73***<br>(0.03) |
| Roommate binge drinking            | --                | --                | -0.07<br>(0.07)   | --                | -0.08<br>(0.07)   |
| Roommate smoking                   | --                | --                | 0.13<br>(0.13)    | --                | 0.16<br>(0.14)    |
| Roommate drugs                     | --                | --                | -0.02<br>(0.07)   | --                | -0.00<br>(0.07)   |
| Roommate gambling                  | --                | --                | 0.04<br>(0.07)    | --                | 0.05<br>(0.07)    |
| Roommate sex multiple partners     | --                | --                | -0.04<br>(0.11)   | --                | -0.03<br>(0.11)   |
| Roommate psychological distress    | --                | --                | 0.01<br>(0.01)    | --                | 0.01<br>(0.01)    |
| Roommate parents' education        | --                | --                | -0.00<br>(0.02)   | --                | 0.01<br>(0.03)    |
| Roommate religiosity               | --                | --                | -0.00<br>(0.03)   | --                | 0.01<br>(0.03)    |
| Roommate exercise                  | --                | --                | -0.00<br>(0.02)   | --                | -0.01<br>(0.02)   |
| Roommate hours spent studying      | --                | --                | 0.01<br>(0.02)    | --                | -0.00<br>(0.02)   |
| Roommate admissions test score     | --                | --                | 0.01<br>(0.03)    | --                | -0.02<br>(0.03)   |
| Roommate high school GPA (z-score) | --                | --                | -0.03<br>(0.03)   | --                | -0.02<br>(0.03)   |
| Roommate Preferences               | --                | ✓                 | --                | --                | ✓                 |
| Respondent female                  | --                | --                | --                | -0.05<br>(0.04)   | --                |
| Respondent race (White)            | --                | --                | --                | -0.00<br>(0.07)   | 0.04<br>(0.07)    |
| Respondent race (Black)            | --                | --                | --                | -0.07<br>(0.11)   | -0.03<br>(0.11)   |
| Respondent race (Hispanic)         | --                | --                | --                | -0.03<br>(0.10)   | -0.03<br>(0.10)   |
| Respondent race (Asian)            | --                | --                | --                | 0.06<br>(0.08)    | 0.11<br>(0.08)    |

|                               |                   |                 |                 |                    |                    |
|-------------------------------|-------------------|-----------------|-----------------|--------------------|--------------------|
| Respondent sexual orientation | --                | --              | --              | -0.08<br>(0.05)    | -0.07<br>(0.05)    |
| Respondent religiosity        | --                | --              | --              | -0.10***<br>(0.03) | -0.09***<br>(0.03) |
| Constant                      | 0.54***<br>(0.11) | 0.91*<br>(0.37) | 0.59*<br>(0.26) | 1.06***<br>(0.18)  | 0.63<br>(0.42)     |
| Observations                  | 512               | 512             | 500             | 509                | 497                |
| Clusters                      | 295               | 295             | 291             | 294                | 290                |
| R-squared                     | 0.60              | 0.64            | 0.60            | 0.61               | 0.64               |

\*\*\* p<0.001; \*\* p<0.01; \* p<0.05; † p<0.1. All models are ordinary least squares regressions (clustered standard errors in parentheses). Both roommate ideology and student ideology are coded on a 1-5 scale. Control variables in model 3 include: frequency of roommate's binge drinking, smoking, use of drugs, gambling, sex with multiple partners, and exercise in the past thirty days; roommate's psychological distress as measured by two items from the K-6 scale (Kessler et al. 2003); roommates' parents' education (highest level obtained by either parent); how religious the roommate is (very, somewhat, a little, not at all); average hours per day spent studying in the last year of high school; standardized admissions test score (total ACT and/or SAT, converted to a z-score based on the within-university distribution); and high school GPA (also converted to a z-score).

**Table S8.** Associations between roommate ideology (wave 1) and student ideology (wave 2), analysis constrained to institution 2

|                                    | (1)                           | (2)               | (3)               | (4)                           | (5)                |
|------------------------------------|-------------------------------|-------------------|-------------------|-------------------------------|--------------------|
| Roommate ideology                  | 0.034 <sup>†</sup><br>(0.018) | 0.029<br>(0.020)  | 0.047*<br>(0.020) | 0.034 <sup>†</sup><br>(0.018) | 0.049*<br>(0.021)  |
| Respondent ideology (wave 1)       | 0.82***<br>(0.02)             | 0.82***<br>(0.02) | 0.81***<br>(0.02) | 0.78***<br>(0.02)             | 0.78***<br>(0.02)  |
| Roommate binge drinking            | --                            | --                | 0.03<br>(0.03)    | --                            | 0.03<br>(0.04)     |
| Roommate smoking                   | --                            | --                | 0.00<br>(0.06)    | --                            | -0.01<br>(0.07)    |
| Roommate drugs                     | --                            | --                | -0.01<br>(0.04)   | --                            | 0.04<br>(0.04)     |
| Roommate gambling                  | --                            | --                | 0.05<br>(0.04)    | --                            | 0.04<br>(0.04)     |
| Roommate sex multiple partners     | --                            | --                | 0.03<br>(0.06)    | --                            | 0.01<br>(0.06)     |
| Roommate psychological distress    | --                            | --                | 0.00<br>(0.00)    | --                            | 0.00<br>(0.00)     |
| Roommate parents' education        | --                            | --                | 0.03*<br>(0.01)   | --                            | 0.03*<br>(0.01)    |
| Roommate religiosity               | --                            | --                | 0.03<br>(0.02)    | --                            | 0.02<br>(0.02)     |
| Roommate exercise                  | --                            | --                | 0.00<br>(0.02)    | --                            | -0.00<br>(0.02)    |
| Roommate hours spent studying      | --                            | --                | -0.01<br>(0.01)   | --                            | -0.00<br>(0.01)    |
| Roommate admissions test score     | --                            | --                | -0.01<br>(0.02)   | --                            | -0.01<br>(0.02)    |
| Roommate high school GPA (z-score) | --                            | --                | 0.02<br>(0.02)    | --                            | 0.03<br>(0.02)     |
| Roommate Preferences               | --                            | ✓                 | --                | --                            | ✓                  |
| Respondent female                  | --                            | --                | --                | -0.04<br>(0.03)               | -0.88***<br>(0.09) |
| Respondent race (White)            | --                            | --                | --                | -0.03<br>(0.08)               | -0.04<br>(0.09)    |
| Respondent race (Black)            | --                            | --                | --                | -0.18<br>(0.11)               | -0.20<br>(0.11)    |
| Respondent race (Hispanic)         | --                            | --                | --                | -0.15*<br>(0.08)              | -0.06<br>(0.09)    |
| Respondent race (Asian)            | --                            | --                | --                | -0.02<br>(0.09)               | -0.03<br>(0.09)    |

|                               |         |        |        |          |          |
|-------------------------------|---------|--------|--------|----------|----------|
| Respondent sexual orientation | --      | --     | --     | -0.11**  | -0.12*** |
|                               | --      | --     | --     | (0.03)   | (0.03)   |
| Respondent religiosity        | --      | --     | --     | -0.07*** | -0.07*** |
|                               | --      | --     | --     | (0.02)   | (0.02)   |
| Constant                      | 0.44*** | 0.68** | 0.09   | 0.92***  | 1.91***  |
|                               | (0.06)  | (0.22) | (0.13) | (0.13)   | (0.31)   |
| Observations                  | 1,120   | 1,120  | 1,093  | 1,115    | 1,088    |
| Clusters                      | 757     | 757    | 747    | 753      | 743      |
| R-squared                     | 0.67    | 0.70   | 0.67   | 0.68     | 0.71     |

\*\*\* p<0.001; \*\* p<0.01; \* p<0.05; † p<0.1. All models are ordinary least squares regressions (clustered standard errors in parentheses). Both roommate ideology and student ideology are coded on a 1-5 scale. Control variables in model 3 include: frequency of roommate's binge drinking, smoking, use of drugs, gambling, sex with multiple partners, and exercise in the past thirty days; roommate's psychological distress as measured by two items from the K-6 scale (Kessler et al. 2003); roommates' parents' education (highest level obtained by either parent); how religious the roommate is (very, somewhat, a little, not at all); average hours per day spent studying in the last year of high school; standardized admissions test score (total ACT and/or SAT, converted to a z-score based on the within-university distribution); and high school GPA (also converted to a z-score).



**Table S9(1).** Using Inverse Probability Weighting to Adjust for Uneven Probability of Treatment

|                                   | (ATE)             | (TME1)         | (TME2)             |
|-----------------------------------|-------------------|----------------|--------------------|
| ATE, 1 unit difference (wave 1)   | 0.64***<br>(0.02) |                |                    |
| ATE, 2+ units difference (wave 1) | 1.62***<br>(0.05) |                |                    |
| Roommate ideology                 | --                | 0.09<br>(0.08) | 0.48***<br>(0.10)  |
| Constant                          | --                | 0.20<br>(0.22) | -1.99***<br>(0.29) |
| Observations                      | 1,632             | 1,632          | 1,632              |
| Clusters                          |                   | 1,052          | 1,052              |

\*\*\* p<0.001; \*\* p<0.01; \* p<0.05. All models are multinomial logit regressions (clustered standard errors in parentheses). TME represents the effects of covariates on assignment to treatment.

**Table S9(2).** Using Inverse Probability Weighting to Adjust for Uneven Probability of Treatment

|                                   | (ATE)             | (TME1)         | (TME2)             |
|-----------------------------------|-------------------|----------------|--------------------|
| ATE, 1 unit difference (wave 1)   | 0.64***<br>(0.02) |                |                    |
| ATE, 2+ units difference (wave 1) | 1.62***<br>(0.05) |                |                    |
| Roommate ideology                 | --                | 0.09<br>(0.08) | 0.48***<br>(0.10)  |
| Institution                       | --                | 0.22<br>(0.16) | 0.13<br>(0.21)     |
| Constant                          | --                | 0.11<br>(0.22) | -2.04***<br>(0.30) |
| Observations                      | 1,632             | 1,632          | 1,632              |
| Clusters                          |                   | 1,038          | 1,038              |

\*\*\* p<0.001; \*\* p<0.01; \* p<0.05. All models are multinomial logit regressions (clustered standard errors in parentheses). TME represents the effects of covariates on assignment to treatment.

**Table S9(3).** Using Inverse Probability Weighting to Adjust for Uneven Probability of Treatment

|                                    | (ATE)             | (TME1)           | (TME2)             |
|------------------------------------|-------------------|------------------|--------------------|
| ATE, 1 unit difference (wave 1)    | 0.63***<br>(0.03) |                  |                    |
| ATE, 2+ units difference (wave 1)  | 1.60***<br>(0.05) |                  |                    |
| Roommate ideology                  | --                | 0.10<br>(0.08)   | 0.56***<br>(0.11)  |
| Institution                        | --                | --               | --                 |
| Roommate binge drinking            | --                | 0.01<br>(0.15)   | -0.08<br>(0.19)    |
| Roommate smoking                   | --                | -0.25<br>(0.25)  | 0.01<br>(0.30)     |
| Roommate drugs                     | --                | 0.09<br>(0.18)   | 0.22<br>(0.23)     |
| Roommate gambling                  | --                | -0.04<br>(0.15)  | 0.23<br>(0.19)     |
| Roommate sex multiple partners     | --                | -0.15<br>(0.23)  | 0.47<br>(0.28)     |
| Roommate psychological distress    | --                | -0.01<br>(0.02)  | 0.03<br>(0.02)     |
| Roommate parents' education        | --                | -0.03<br>(0.06)  | 0.14<br>(0.07)     |
| Roommate religiosity               | --                | 0.01<br>(0.07)   | 0.06<br>(0.09)     |
| Roommate exercise                  | --                | -0.05<br>(0.06)  | 0.09<br>(0.08)     |
| Roommate hours spent studying      | --                | -0.11*<br>(0.05) | -0.07<br>(0.06)    |
| Roommate admissions test score     | --                | -0.01<br>(0.08)  | 0.01<br>(0.10)     |
| Roommate high school GPA (z-score) | --                | 0.02<br>(0.07)   | 0.01<br>(0.09)     |
| Constant                           | --                | 0.88<br>(0.53)   | -3.56***<br>(0.79) |
| Observations                       | 1,593             | 1,593            | 1,593              |
| Clusters                           |                   | 1,036            | 1,036              |

\*\*\* p<0.001; \*\* p<0.01; \* p<0.05. All models are multinomial logit regressions (clustered standard errors in parentheses). TME represents the effects of covariates on assignment to treatment.

**Table S9(4).** Using Inverse Probability Weighting to Adjust for Uneven Probability of Treatment

|                                    | (ATE)             | (TME1)           | (TME2)            |
|------------------------------------|-------------------|------------------|-------------------|
| ATE, 1 unit difference (wave 1)    | 0.63***<br>(0.03) |                  |                   |
| ATE, 2+ units difference (wave 1)  | 1.58***<br>(0.05) |                  |                   |
| Roommate ideology                  | --                | 0.11<br>(0.08)   | 0.58***<br>(0.11) |
| Institution                        | --                | 0.27<br>(0.17)   | 0.26<br>(0.22)    |
| Roommate binge drinking            | --                | 0.02<br>(0.15)   | -0.09<br>(0.19)   |
| Roommate smoking                   | --                | -0.24<br>(0.26)  | 0.01<br>(0.31)    |
| Roommate drugs                     | --                | 0.08<br>(0.18)   | 0.25<br>(0.23)    |
| Roommate gambling                  | --                | -0.05<br>(0.15)  | 0.22<br>(0.19)    |
| Roommate sex multiple partners     | --                | -0.15<br>(0.23)  | 0.48<br>(0.28)    |
| Roommate psychological distress    | --                | -0.00<br>(0.02)  | 0.03<br>(0.02)    |
| Roommate parents' education        | --                | -0.04<br>(0.06)  | 0.14<br>(0.08)    |
| Roommate religiosity               | --                | 0.00<br>(0.07)   | 0.05<br>(0.09)    |
| Roommate exercise                  | --                | -0.05<br>(0.06)  | 0.10<br>(0.08)    |
| Roommate hours spent studying      | --                | -0.12*<br>(0.05) | -0.07<br>(0.07)   |
| Roommate admissions test score     | --                | 0.00<br>(0.08)   | 0.03<br>(0.10)    |
| Roommate high school GPA (z-score) | --                | 0.02<br>(0.07)   | 0.01<br>(0.09)    |
| Respondent race (White)            | --                | 0.06<br>(0.25)   | -0.31<br>(0.34)   |
| Respondent race (Black)            | --                | -0.08<br>(0.37)  | -0.91<br>(0.49)   |
| Respondent race (Hispanic)         | --                | 0.10<br>(0.28)   | -0.30<br>(0.41)   |
| Respondent race (Asian)            | --                | -0.14<br>(0.26)  | -0.94*<br>(0.38)  |
| Respondent sexual orientation      | --                | 0.17             | 0.03              |

|                        |       |        |          |
|------------------------|-------|--------|----------|
|                        | --    | (0.11) | (0.15)   |
| Respondent religiosity | --    | 0.01   | -0.04    |
|                        | --    | (0.06) | (0.08)   |
| Constant               | --    | 0.60   | -3.14*** |
|                        | --    | (0.64) | (0.91)   |
| Observations           | 1,589 | 1,589  | 1,589    |
| Clusters               |       | 1,036  | 1,036    |

\*\*\* p<0.001; \*\* p<0.01; \* p<0.05. All models are multinomial logit regressions (clustered standard errors in parentheses). TME represents the effects of covariates on assignment to treatment.

**Table S10.** Using Inverse Probability Weighting to Adjust for Uneven Probability of Treatment

*DV: Difference in Respondent and Roommate  
Political Ideology at Wave 2*

|                            | (1)               | (2)               | (4)                         | (5)                                                     |
|----------------------------|-------------------|-------------------|-----------------------------|---------------------------------------------------------|
| Treatment                  | 0.86***<br>(0.03) | 0.86***<br>(0.03) | 0.85***<br>(0.03)           | 0.84***<br>(0.03)                                       |
| <i>Control variable(s)</i> |                   |                   |                             | Institution,<br>Roommate<br>Characteristics,<br>Student |
| Other controls             | -                 | Institution       | Roommate<br>Characteristics | Characteristics                                         |
| Observations               | 1,632             | 1,632             | 1,593                       | 1,589                                                   |

\*\*\* p<0.001; \*\* p<0.01; \* p<0.05. All models are logit regressions (robust standard errors in parentheses).

**Table S11.** Randomization Check

---

*DV: Respondent Political Views  
(wave 1)*

---

|                                   |                |
|-----------------------------------|----------------|
| Roommate Political Views (wave 1) | 0.02<br>(0.03) |
| Roommate Preferences              | ✓              |
| Observations                      | 1,632          |
| Clusters                          | 1,052          |
| R-squared                         | 0.12           |

---

\*\*\* p<0.001; \*\* p<0.01; \* p<0.05. Ordinary least squares regressions (clustered standard errors in parentheses). This randomization check provides no reason to believe roommate and respondent baseline ideology are correlated net of the preference variables. Roommate preference variables are omitted from the presentation because they are a series of 152 dummy variables, and as such, defy tidy presentation.

**Table S12.** Subgroup Analysis  
Average Changes in Ideology Given Roommate-Student Pairing at Wave 1

|                |              | <i>Roommate Wave 1</i> |         |         |              |           |
|----------------|--------------|------------------------|---------|---------|--------------|-----------|
|                |              | far left               | liberal | middle  | conservative | far right |
| <i>Student</i> |              | 0.500                  | 0.317   | 0.500   | 0.200        | n/a       |
| <i>Wave 1</i>  | far left     | (n=2)                  | (n=41)  | (n=16)  | (n=10)       | (n=0)     |
|                |              | 0.055                  | 0.145   | 0.179   | 0.200        | 0.142     |
|                | liberal      | (n=36)                 | (n=255) | (n=251) | (n=95)       | (n=7)     |
|                |              | 0.000                  | -0.025  | -0.050  | -0.011       | 0.000     |
|                | middle       | (n=9)                  | (n=231) | (n=218) | (n=93)       | (n=2)     |
|                |              | -0.273                 | -0.245  | -0.190  | -0.074       | 0.000     |
|                | conservative | (n=11)                 | (n=94)  | (n=100) | (n=54)       | (n=3)     |
|                |              | n/a                    | -1.142  | -0.500  | -0.500       | n/a       |
|                | far right    | (n=0)                  | (n=7)   | (n=2)   | (n=2)        | (n=0)     |

Note: Here a positive number indicates a move to the right, while a negative number indicates a move to the left (on average). Thus, we would expect to see number close to zero on the diagonal, positive numbers above the diagonal, and negative numbers below the diagonal. This is what we in fact see.



**Table S13.** Mediation Analysis

| <b>Effect</b>         | <b>Mean</b> | <b>[95% Conf. Interval]</b> |         |
|-----------------------|-------------|-----------------------------|---------|
| ACME                  | 0.00023     | -0.00127                    | 0.00223 |
| Direct Effect         | 0.77819     | 0.73654                     | 0.81999 |
| Total Effect          | 0.77843     | 0.73673                     | 0.81980 |
| % of Tot Eff mediated | 0.00030     | 0.00028                     | 0.00031 |
| Observations          | 1,611       |                             |         |
| Clusters              | 1,046       |                             |         |

Note: Causal mediation analysis provides no meaningful evidence that the causal effect of roommate ideology runs through self-reported roommate friendship.
